# Supplementary material for: A Neural Sensor with a Nanocomposite Interface for the Study of Spike Characteristics of Hippocampal Neurons under Learning Training
Source: MDPI journal article supplement (doi:10.3390/bios12070546), 2022-07-21
Supplement: s1 [file s1]

# Supplementary Materials

## **A Neural Sensor with Nanocomposites Interface for the Study of the Spike Characteristics of Hippocampal Neurons under Learning Training**

Shihong Xu<sup>1,2</sup>, Yu Deng<sup>3</sup>, Jinping Luo<sup>1,2</sup>, Yaoyao Liu<sup>1,2</sup>, Enhui He<sup>1,2</sup>, Yan Yang<sup>1,2</sup>,  
Kui Zhang<sup>1,2</sup>, Longze Sha<sup>3</sup>, Yuchun Dai<sup>1,2</sup>, Tao Ming<sup>1,2</sup>, Yilin Song<sup>1,2</sup>, Luyi Jing<sup>1,2</sup>,  
Qi Xu<sup>3,\*</sup>, Chengyu Zhuang<sup>4,\*</sup>, Xinxia Cai<sup>1,2,\*</sup>

<sup>a</sup> State Key Laboratory of Transducer Technology, Aerospace Information Research  
Institute, Chinese Academy of Sciences, Beijing 100190, China.

<sup>b</sup> School of Electronic, Electrical and Communication Engineering, University of  
Chinese Academy of Sciences, Beijing 100049, China.

<sup>c</sup> State Key Laboratory of Medical Molecular Biology, Institute of Basic Medical  
Sciences, Chinese Academy of Medical Sciences and Peking Union Medical College,  
Beijing 100005, China.

<sup>d</sup> Department of Orthopaedics, Ruijin Hospital, Shanghai Jiao Tong University School  
of Medicine, Shanghai 200025, China.

**Figure S1:**

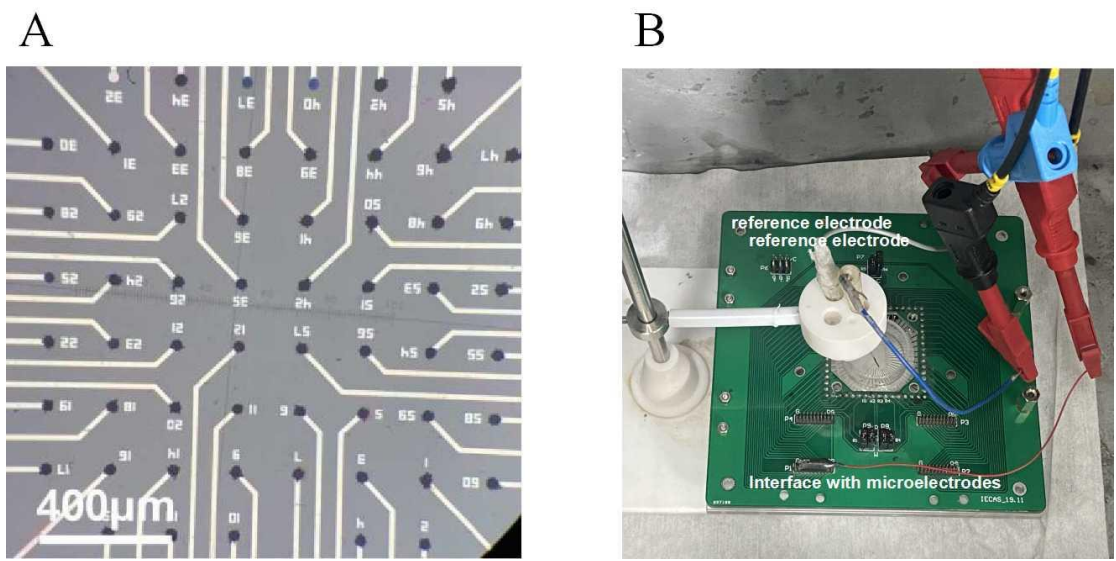

Figure S1. The internal layout and interface circuit of MEA. (A) Internal layout of MEA. (B) The interface circuit of MEA.

**Figure S2:**

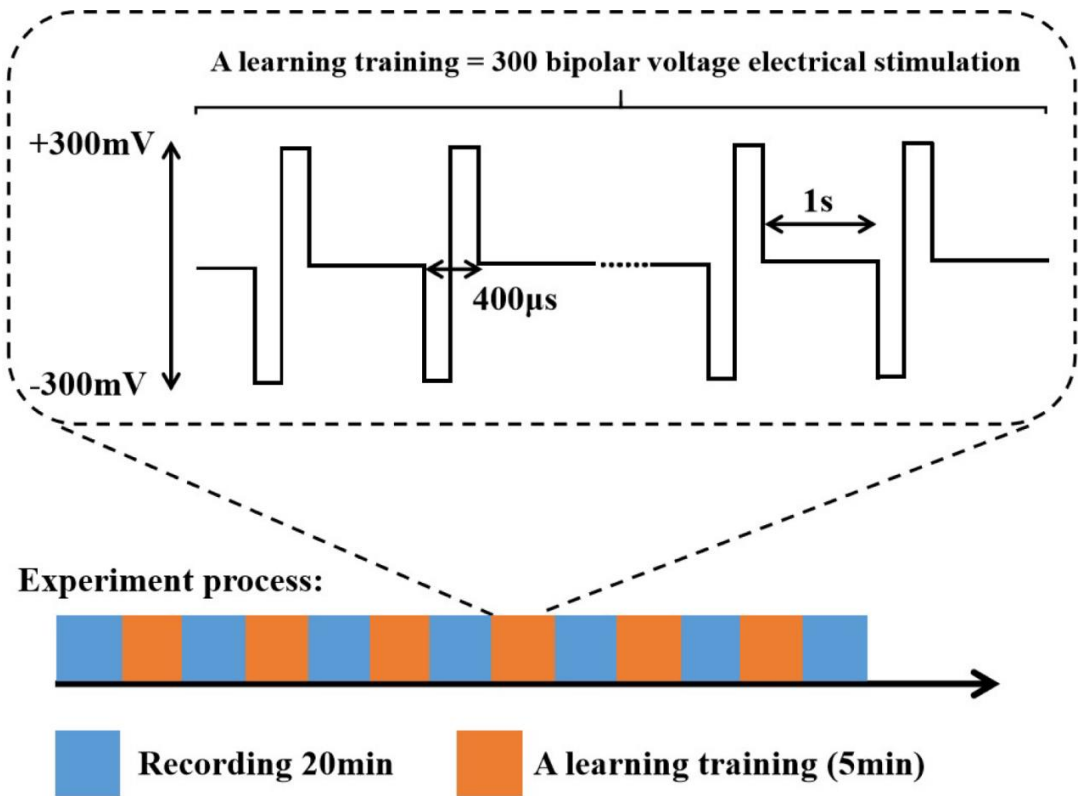

Figure S2. Electrical stimulation model for activation of hippocampal neurons to

produce learning.

### Figure S3:

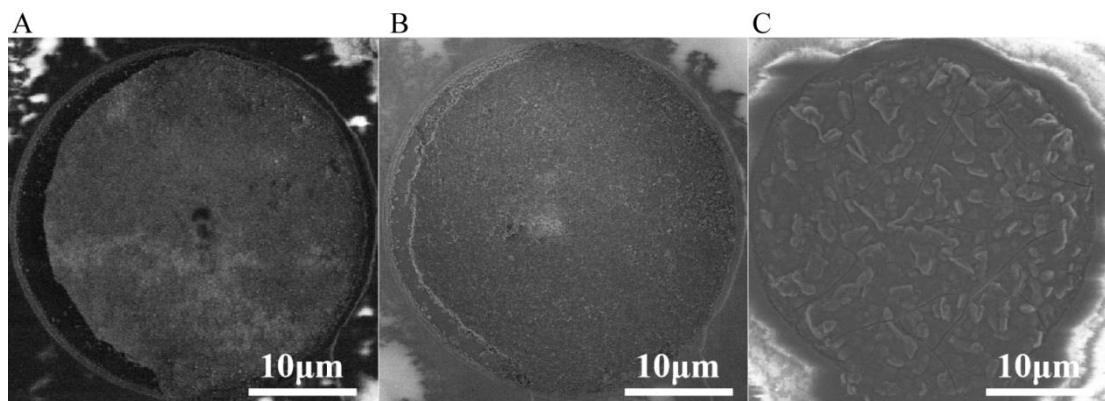

Figure S3. SEM images of three neural interfaces. (A) SEM image of Pt. (B) SEM image of CNT/PEDOT:PSS. (C) SEM image of cGO/PEDOT:PSS.

### Figure S4:

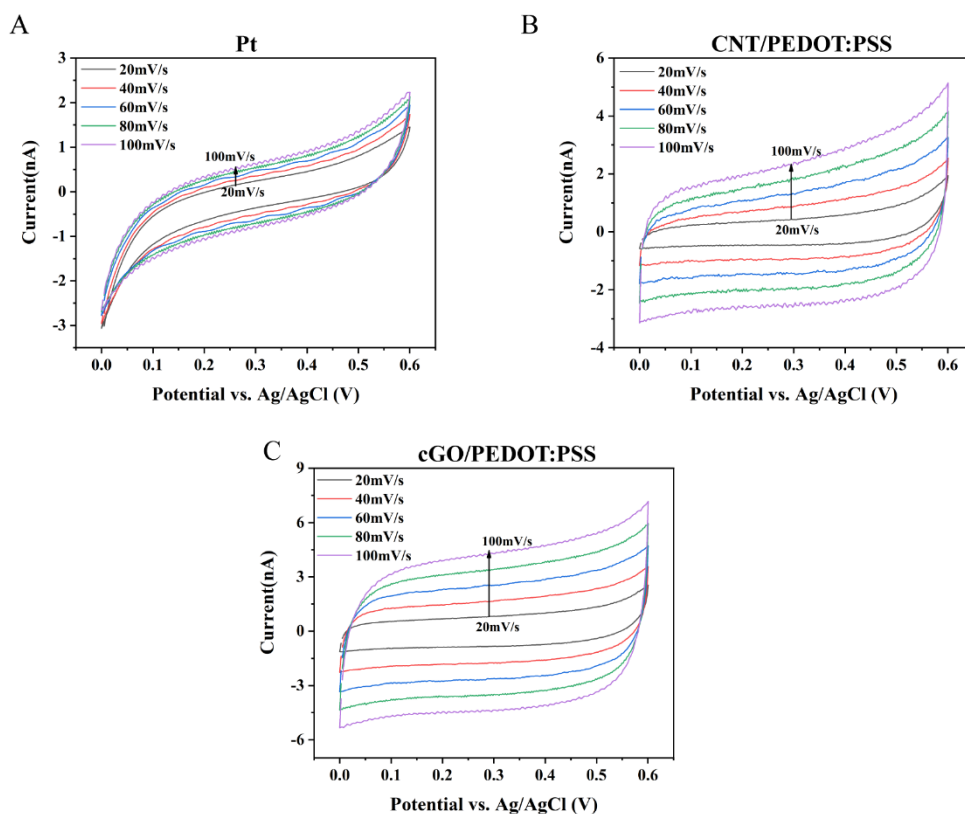

Figure S4. Measurements of Cdl from cyclic voltammetry experiments. (A) The cyclic voltammetry curves of Pt at different scan rates. (B) The cyclic voltammetry curves of CNT/PEDOT:PSS at different scan rates. (C) The cyclic voltammetry curves of cGO/PEDOT:PSS at different scan rates.

**Figure S5:**

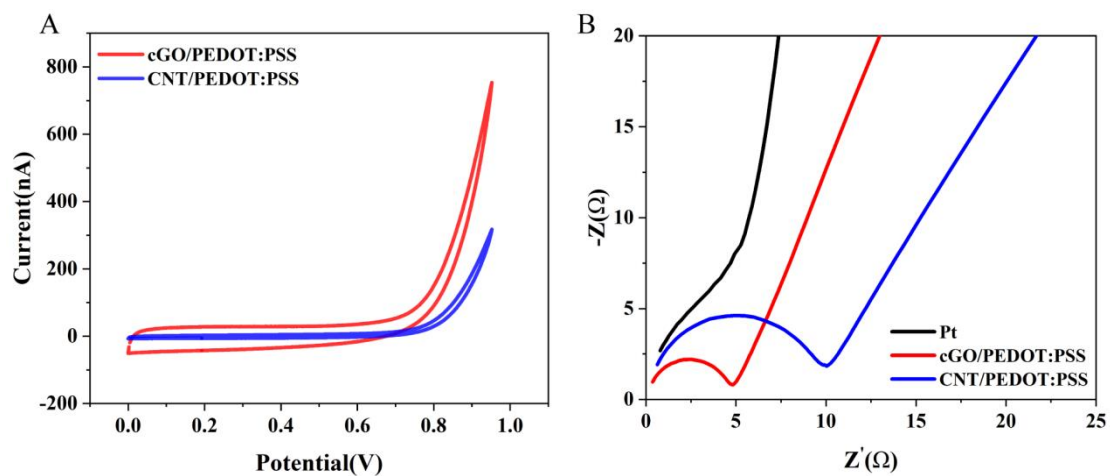

Figure S5. The electrical characteristics of neural sensor. (A) The reaction current of CNT/PEDOT:PSS and cGO/PEDOT:PSS during modification. (B) The Nyquist impedance spectrum of Pt, CNT/PEDOT:PSS and cGO/PEDOT:PSS-modified microelectrodes.

**Figure S6:**

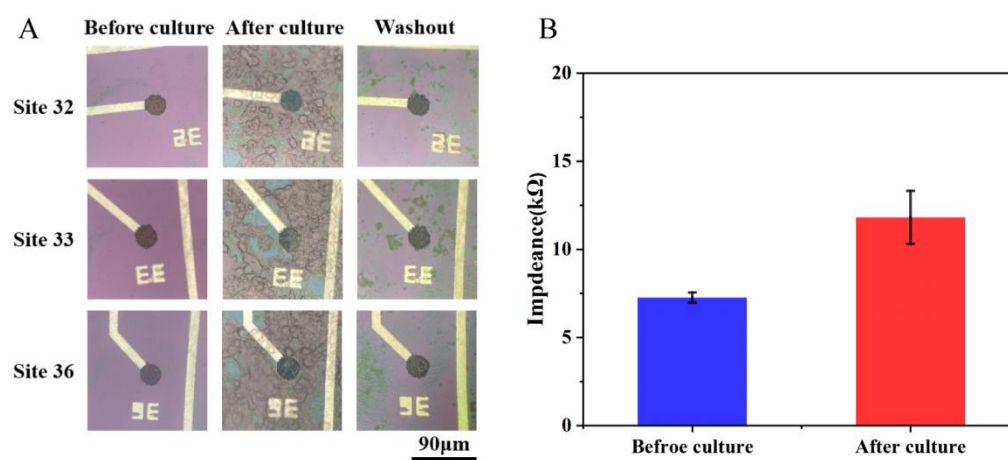

Figure S6. The biocompatibility and stability of cGO/PEDOT:PSS-modified microelectrodes. (A) Changes of coating material (cGO/PEDOT:PSS) morphology before and after cell culture. (B) The impedance of CNT/PEDOT:PSS-modified microelectrodes before and after cell culture (n=5).

**Figure S7:**

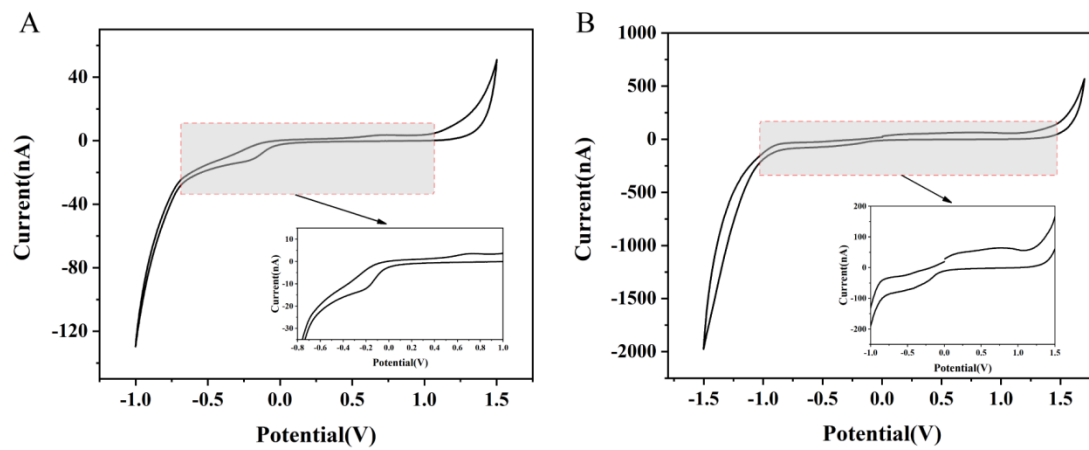

Figure S7. The safe potential window of Pt and cGO/PEDOT:PSS. (A) The safe potential window of Pt. (B) The safe potential window of cGO/PEDOT:PSS

**Figure S8:**

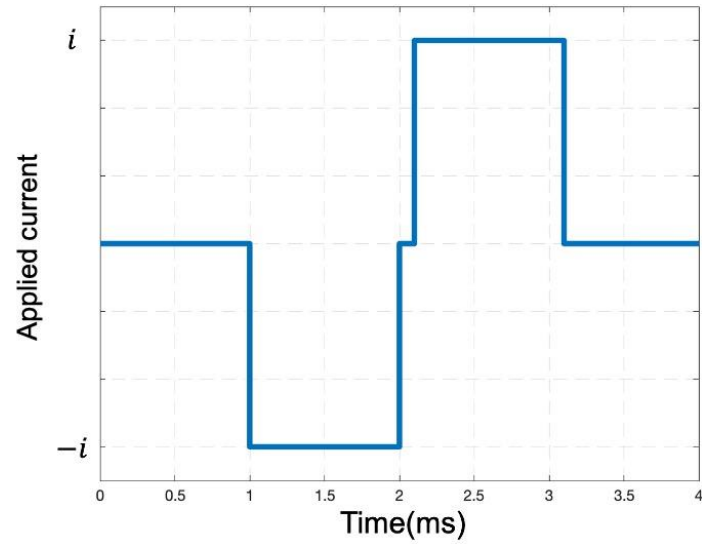

Figure S8. Detecting charge injection limits (CIL) pulsing currents applied to neural interfaces.

**Table S1**

Table S1. Comparison of electrochemical performance of electrodes modified with different materials.

| Electrode material | Geometric area ( $\mu\text{m}^2$ ) | $ Z $ [ $\text{M}\Omega\ \mu\text{m}^2$ ]<br>at 1 kHz | CSC (mC/cm <sup>2</sup> ) | CIL(mC/cm <sup>2</sup> ) | Reference |
|--------------------|------------------------------------|-------------------------------------------------------|---------------------------|--------------------------|-----------|
| Pt                 | 706.5                              | 393.8                                                 | 0.37                      | 0.19                     | This work |
| PtIr               | 4500                               | 452                                                   | 1.2                       | 0.15                     | [1]       |
| Au                 | -                                  | -                                                     | 0.4                       | 0.4                      | [2]       |
| TiN                | 4000                               | -                                                     | 2.47                      | 0.9                      | [3]       |
| Ir                 | 1250                               | 586                                                   | 0.1                       | NA                       | [4]       |
| PtNPs              | 5000                               | 390                                                   | 1.2                       | 3                        | [5]       |
| CNT array          | 5700                               | 5.9                                                   | -                         | 1-1.6                    | [6]       |
| CNT/PEDOT:PSS      | 706.5                              | 11.89                                                 | 4.80                      | 1.93                     | This work |
| cGO/PEDOT:PSS      | 706.5                              | 5.13                                                  | 7.53                      | 3.11                     | This work |

**Figure S9:**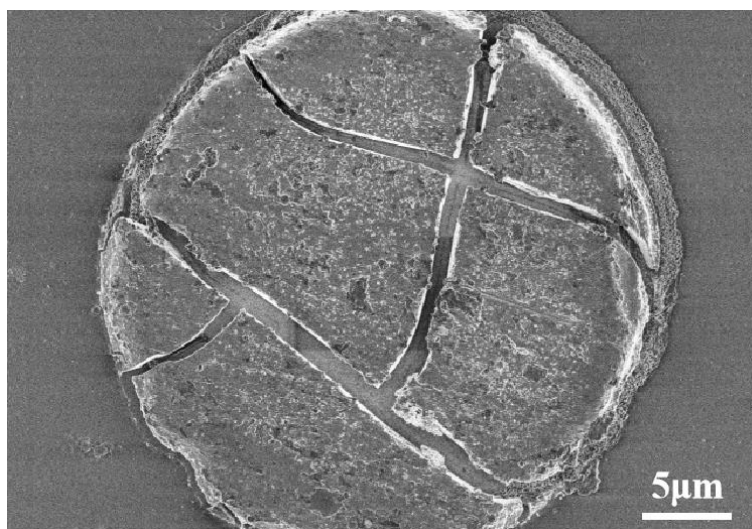

Figure S9. SEM images of PEDOT:PSS-modified microelectrodes after multiple CV scans

**Figure S10:**

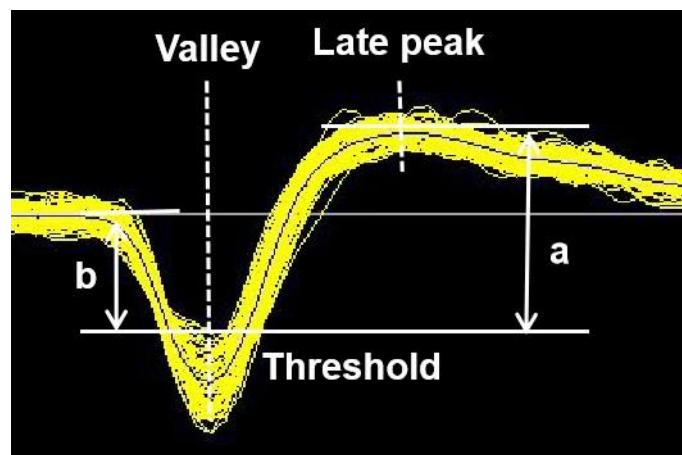

Figure S10. Neuron Classification Methods.

$$\text{Spike duration} = T_{\text{Late peak}} - T_{\text{Valley}}$$

$$\text{Symmetry index} = (a-b)/(a+b)$$

## Reference:

- (1) Venkatraman, S.; Hendricks, J.; King, Z. A.; Sereno, A. J.; Richardson-Burns, S.; Martin, D.; Carmena, J. M., In vitro and in vivo evaluation of PEDOT microelectrodes for neural stimulation and recording. *IEEE Trans Neural Syst Rehabil Eng* 2011, 19 (3), 307-316.
- (2) Du, ZJ; Luo, XL; Weaver, CL; Cui, XT. Poly(3,4-ethylenedioxythiophene)-ionic liquid coating improves neural recording and stimulation functionality of MEAs. *JOURNAL OF MATERIALS CHEMISTRY C* 2015, 3(25), 6515-6524.
- (3) Weiland, J. D.; Anderson, D. J.; Humayun, M. S., In vitro electrical properties for iridium oxide versus titanium nitride stimulating electrodes. *IEEE Trans Biomed Eng* 2002, 49 (12 Pt 2), 1574-1579.



- (4) Mohammad Reza Abidian; Joseph M. Corey; Daryl R. Kipke; David C. Martin.  
Conducting-Polymer Nanotubes Improve Electrical Properties, Mechanical Adhesion, Neural Attachment, and Neurite Outgrowth of Neural Electrodes. *Small* 2010, 6(3), 421-429.
- (5) Wang, K.; Fishman, H. A.; Dai, H. J.; Harris, J. S., Neural stimulation with a carbon nanotube microelectrode array. *Nano Letters* 2006, 6 (9), 2043-2048.
- (6) Park, S.; Song, Y. J.; Boo, H.; Chung, T. D., Nanoporous Pt Microelectrode for Neural Stimulation and Recording: In Vitro Characterization. *Journal of Physical Chemistry C* 2010, 114 (19), 8721-8726.
